# Supplementary material for: Influence of different final irrigation protocols for removal of photosensitizer activaded by ultrasonic device on the bond strength of gutta-percha/bioceramic sealer and fiberglass posts/self-adhesive cement
Source: Research Square preprint supplement (doi:10.21203/rs.3.rs-7934333/v1), 2025-12-11
Supplement: Supplementary file 1 [file 4d3f935ecd61df73fd45b500.docx]

| **Table 2.** Mean (standard deviation) of bond strength of restorative material to root canal dentin (MPa) and percentage of pattern of failure (%) of tested final irrigation protocols. | | | | | |
| --- | --- | --- | --- | --- | --- |
| Group | n | Push Out Bond Strength | Failure mode | | |
| Adhesive | Mixed | Cohesive |
| 1. DW + US a | 30 | 4.90 (1.83) | 6.67 | 39.99 | 53.34 |
| 2. EDTA b | 30 | 21.43 (3.99) | 10.00 | 26.66 | 63.34 |
| 3. GA b | 30 | 22.55 (4.41) | 6.67 | 33.33 | 50.00 |
| 4. EDTA + US c | 30 | 30.95 (3.74) | 10.00 | 40.00 | 50.00 |
| 5. GA + US c | 30 | 33.70 (3.02) | 10.00 | 36.66 | 53.34 |
| * Different superscript lowercase letters indicate, in the column, statistically significant differences (p < 0.05).  ** DW, distilled water; US, ultrasonic activation; EDTA, Ethylenediaminetetraacetic acid; GA, glycolic acid. | | | | | |

A média (desvio padrão) da resistência de união do material restaurador à dentina radicular e o percentual dos padrões de falha após os protocolos de irrigação final testados estão expressos na Tabela 2. De acordo com os resultados obtidos, pode-se observar que a resistência de união foi significativamente maior nos grupos 4 (ETDA+US) e 5 (GA+US) quando comparados aos demais grupos (p<0,05), sem diferença estatisticamente significante entre si (p>0,05). Em relação ao percentual dos padrões de falha, não foi revelada diferença estatisticamente significante entre os grupos testados (p>0,05), havendo predomínio de falha coesiva em todos os grupos, seguido pela falha mista e, por fim, falha adesiva.
